# Supplementary material for: Vitamin D Levels in Early and Middle Pregnancy and Preeclampsia, a Systematic Review and Meta-Analysis
Source: MDPI journal article supplement (doi:10.3390/nu14050999), 2022-02-27
Supplement: s1 [file s1]

**Table S1:** Search method for literature.

| <b>Pubmed</b>           |                                                                                                                                                                                                                                                                                                                                                                                                                                                                                       |
|-------------------------|---------------------------------------------------------------------------------------------------------------------------------------------------------------------------------------------------------------------------------------------------------------------------------------------------------------------------------------------------------------------------------------------------------------------------------------------------------------------------------------|
| #1                      | ((vitamin D[MeSH Terms]) OR (vitamin D[Title/Abstract])) OR (cholecalciferol[Title/Abstract]) OR (ergocalciferol[Title/Abstract])                                                                                                                                                                                                                                                                                                                                                     |
| #2                      | (pregnancy[MeSH Terms]) OR (pregnancy[Title/Abstract])                                                                                                                                                                                                                                                                                                                                                                                                                                |
| #3                      | ((((((((((pre-eclampsia[MeSH Terms]) OR (eclampsia[MeSH Terms])) OR (Hypertension, Pregnancy-Induced[MeSH Terms])) OR (preeclampsia[Title/Abstract])) OR (hypertensive disorder of pregnancy[Title/Abstract])) OR (gestational hypertension[Title/Abstract])) OR (gestational hypertensive disorder[Title/Abstract])) OR (hypertensive disorder during pregnancy[Title/Abstract])) OR (pregnancy induced hypertension[Title/Abstract])) OR (pre-eclamptic toxemia[Title/Abstract]))   |
| A total of 441          | #1 AND #2 AND #3                                                                                                                                                                                                                                                                                                                                                                                                                                                                      |
| <b>Cochrane library</b> |                                                                                                                                                                                                                                                                                                                                                                                                                                                                                       |
| #1                      | MeSH descriptor: [Vitamin D] explode all trees OR (vitamin D):ti,ab,kw OR (cholecalciferol):ti,ab,kw OR (ergocalciferol):ti,ab,kw                                                                                                                                                                                                                                                                                                                                                     |
| #2                      | MeSH descriptor: [Pregnancy] explode all trees OR (pregnancy):ti,ab,kw                                                                                                                                                                                                                                                                                                                                                                                                                |
| #3                      | MeSH descriptor: [Pre-Eclampsia] explode all trees OR MeSH descriptor: [Eclampsia] explode all trees OR MeSH descriptor: [Hypertension, Pregnancy-Induced] explode all trees OR (preeclampsia):ti,ab,kw OR (hypertensive disorder of pregnancy):ti,ab,kw OR (gestational hypertension):ti,ab,kw OR (gestational hypertensive disorder):ti,ab,kw OR (hypertensive disorder during pregnancy):ti,ab,kw OR (pregnancy induced hypertension):ti,ab,kw OR (pre-eclamptic toxemia):ti,ab,kw |
| A total of 134          | #1 AND #2 AND #3                                                                                                                                                                                                                                                                                                                                                                                                                                                                      |
| <b>Embase</b>           |                                                                                                                                                                                                                                                                                                                                                                                                                                                                                       |
| #1                      | 'vitamin d':ti,ab,kw OR coilecalciferol:ti,ab,kw OR ergocalciferol:ti,ab,kw                                                                                                                                                                                                                                                                                                                                                                                                           |
| #2                      | pregnancy:ti,ab,kw                                                                                                                                                                                                                                                                                                                                                                                                                                                                    |
| #3                      | preeclampsia:ti,ab,kw OR 'hypertensive disorder of pregnancy':ti,ab,kw OR 'gestational hypertension':ti,ab,kw OR 'gestational hypertensive disorder':ti,ab,kw OR 'hypertensive disorder during pregnancy':ti,ab,kw OR 'pregnancy induced hypertension':ti,ab,kw OR 'pre-eclamptic toxemia':ti,ab,kw                                                                                                                                                                                   |
| A total of 469          | #1 AND #2 AND #3                                                                                                                                                                                                                                                                                                                                                                                                                                                                      |
| <b>WOS</b>              |                                                                                                                                                                                                                                                                                                                                                                                                                                                                                       |
| #1                      | ((TS=(vitamin D)) OR TS=(cholecalciferol)) OR TS=(ergocalciferol)                                                                                                                                                                                                                                                                                                                                                                                                                     |
| #2                      | TS=(pregnancy)                                                                                                                                                                                                                                                                                                                                                                                                                                                                        |

|                   |                                                                                                                                                                                                                          |
|-------------------|--------------------------------------------------------------------------------------------------------------------------------------------------------------------------------------------------------------------------|
| #3                | ((((TS=(preeclampsia)) OR TS=(hypertensive disorder of pregnancy)) OR TS=(gestational hypertension)) OR TS=(gestational hypertensive disorder)) OR TS=(hypertensive disorder during pregnancy)) OR TS=(pregnancy induced |
| A total of<br>487 | #1 AND #2 AND #3                                                                                                                                                                                                         |
