# Supplementary material for: Vitamin D Levels in Early and Middle Pregnancy and Preeclampsia, a Systematic Review and Meta-Analysis
Source: MDPI journal article supplement (doi:10.3390/nu14050999), 2022-02-27
Supplement: s1 [file s1]

Table S5. Vitamin D cutoff values and the calculated rate of preeclampsia in the included studies.

| Author (year)                          | Vitamin D cutoff | Calculated rate  | Confounding factors identified in each studies                                                                                                                                                           |
|----------------------------------------|------------------|------------------|----------------------------------------------------------------------------------------------------------------------------------------------------------------------------------------------------------|
| Wetta, Biggio et al. (2014)            | $\geq 30$        | 30.3% (33/109)   | Age, race/ethnicity, parity, history of a prior preterm birth, maternal weight at first prenatal visit, smoking status, gestational age at which the sample was drawn and time of year specimen obtained |
|                                        | 15-30            | 33.6% (38/113)   |                                                                                                                                                                                                          |
|                                        | <15 ng/ml        | 40.9% (18/44)    |                                                                                                                                                                                                          |
|                                        | (<30 ng/mL)      | 34.8% (56/157)   |                                                                                                                                                                                                          |
| Baker, Haeri et al. (2010)             | $\geq 75$        | 13.8% (22/160)   | Season of blood draw, maternal age, multiparity, body mass index, and gestational age at serum collection                                                                                                |
|                                        | 50-75            | 19.6% (10/51)    |                                                                                                                                                                                                          |
|                                        | <50 nmol/liter   | 36.7% (11/30)    |                                                                                                                                                                                                          |
| Zhou, Su et al. (2014)                 | $\geq 30$        | 3.51% (13/370)   | Maternal age, systolic/diastolic pressure, prepregnancy body mass index and serum calcium                                                                                                                |
|                                        | 21-29            | 3.81% (36/946)   |                                                                                                                                                                                                          |
|                                        | <20 ng/mL        | 3.92% (25/637)   |                                                                                                                                                                                                          |
| Schneuer, Roberts et al. (2014)        | >75              | 3.7% (37/999)    | Maternal age, parity, smoking during pregnancy, maternal weight, previously diagnosed hypertension, previously diagnosed diabetes, season at sampling, country of birth, or socioeconomic disadvantage   |
|                                        | 37.5-75          | 5.7% (186/3275)  |                                                                                                                                                                                                          |
|                                        | <37.5 nmol/L     | 3.7% (31/835)    |                                                                                                                                                                                                          |
| Powe, Seely et al. (2010)              | >15              | 12.5% (5/40)     | Body mass index, nonwhite race, and summer blood collection                                                                                                                                              |
|                                        | <15 ng/mL        | 26.2% (34/130)   |                                                                                                                                                                                                          |
| Baca, Simhan et al. (2016)             | >75              | 20.5% (209/1018) | Year of delivery, laboratory batch number, gestational age and season at blood drawn, race/ethnicity, maternal age, smoking status, prepregnancy BMI, insurance, education, marital status, and parity   |
|                                        | 50-75            | 30.5% (261/856)  |                                                                                                                                                                                                          |
|                                        | <50 nmol/L       | 39.7% (180/453)  |                                                                                                                                                                                                          |
| Bodnar, Catov et al. (2007)            | >75              | 14.0% (12/86)    | Race/ethnicity, season, sample, gestational age, prepregnancy BMI, and education.                                                                                                                        |
|                                        | 37.5-75          | 17.6% (23/131)   |                                                                                                                                                                                                          |
|                                        | <37.5 nmol/liter | 29.2% (14/48)    |                                                                                                                                                                                                          |
| Benachi, Baptiste et al. (2020)        | <30              | 22.6% (69/305)   | Parity, maternal age, pre-pregnancy BMI, season of conception, skin color                                                                                                                                |
|                                        | $\geq 30$ ng/mL  | 14.4% (14/97)    |                                                                                                                                                                                                          |
| Achkar, Dodds et al. (2015)            | $\geq 50$        | 6.0% (65/1092)   | Pre-pregnancy body mass index, parity, maternal age, smoking, season of blood collection, year of blood collection, gestational age at blood collection, and study site                                  |
|                                        | 30-50            | 9.2% (72/779)    |                                                                                                                                                                                                          |
|                                        | $\leq 30$ nmol/L | 13.6% (24/177)   |                                                                                                                                                                                                          |
|                                        | (<50 nmol/L)     | 10.0% (96/956)   |                                                                                                                                                                                                          |
| Fernández-Alonso,                      | $\geq 30$        | 1.8% (2/109)     | None                                                                                                                                                                                                     |
| Dionis-Sánchez et al. (2012)           | 21-29            | 1.6% (3/191)     |                                                                                                                                                                                                          |
|                                        | $\leq 20$ ng/mL  | 1.2% (2/166)     |                                                                                                                                                                                                          |
| Christoph, Challande et al. (2020)     | $\geq 50$        | 1.6% (6/370)     | None                                                                                                                                                                                                     |
|                                        | <50 nmol/L       | 1.8% (18/1012)   |                                                                                                                                                                                                          |
| Al-Shaikh, Ibrahim et al. (2016)       | $\geq 30$        | 0% (0/38)        | None                                                                                                                                                                                                     |
|                                        | 21-29            | 0% (0/98)        |                                                                                                                                                                                                          |
|                                        | $\leq 20$ ng/mL  | 1.0% (9/864)     |                                                                                                                                                                                                          |
| Hemmingway, Kenny et al. (2018)        | $\geq 75$        | 2.3% (10/441)    | BMI, maternal age, university education, and supplementation                                                                                                                                             |
|                                        | <75 nmol/L       | 3.0% (39/1313)   |                                                                                                                                                                                                          |
| Mirzakhani, Litonjua et al. (2016)     | <30              | 34.4% (41/119)   | Gravidity, age, race, BMI, study group designation, education level, income, and study center                                                                                                            |
|                                        | $\geq 30$ ng/mL  | 15.8% (6/38)     |                                                                                                                                                                                                          |
| Wei, Audibert et al. (2012)            | $\geq 50$        | 4.0% (17/425)    | Maternal age, smoking, prepregnancy body mass index and season of blood draw                                                                                                                             |
|                                        | <50 nmol/L       | 5.5% (15/272)    |                                                                                                                                                                                                          |
| Flood-Nichols, Tinnemore et al. (2015) | >30              | 10.0% (7/70)     | BMI, season, ethnicity, and tobacco use                                                                                                                                                                  |
|                                        | 21-29            | 7.1% (10/141)    |                                                                                                                                                                                                          |
|                                        | <20 ng/mL        | 8.3% (2/24)      |                                                                                                                                                                                                          |
| Shand, Nassar et al.                   | >75              | 15.9% (7/44)     | Maternal age, ethnicity, parity, BMI, season, multivitamin use and                                                                                                                                       |

|                                         |                |                |                                                                                                                         |
|-----------------------------------------|----------------|----------------|-------------------------------------------------------------------------------------------------------------------------|
| (2010)                                  | 50-75          | 6.6% (4/61)    | smoking status                                                                                                          |
|                                         | <50 nmol/liter | 14.7% (17/116) |                                                                                                                         |
| Van Weert, van den Berg et al. (2016)   | >50            | 3.4% (43/1263) | Age, ethnicity, pre-pregnancy BMI, smoking and years of education after primary school.                                 |
|                                         | 30-50          | 4.3% (19/442)  |                                                                                                                         |
|                                         | <30 nmol/liter | 5.4% (20/369)  |                                                                                                                         |
| Magnus, Miliku et al. (2018)            | >75            | 4.4% (54/1232) | Age, parity, pre-pregnancy BMI, education, smoking, calcium level/calcium intake and gestational week of blood sampling |
|                                         | 50-75          | 5.0% (50/993)  |                                                                                                                         |
|                                         | <50 nmol/liter | 5.0% (55/1098) |                                                                                                                         |
| Scholl, Chen et al. (2013)              | ≥20.0          | 5.1% (38/750)  | Age, parity, ethnicity, BMI, smoking, and gestation at entry                                                            |
|                                         | < 20.0 ng/mL   | 7.9% (31/391)  |                                                                                                                         |
| Álvarez-Fernández, Prieto et al. (2015) | ≥50            | 28.6% (6/21)   | Uric acid and aspartate aminotransferase concentrations, multiple gestation and intrauterine growth restriction         |
|                                         | <50 nmol/L     | 28.1% (34/121) |                                                                                                                         |
| Gidlöf, Silva et al. (2015)             | ≥50            | 28.4% (23/81)  | None                                                                                                                    |
|                                         | <50 nmol/L     | 18.4% (14/76)  |                                                                                                                         |
