# Supplementary material for: Vitamin D Levels in Early and Middle Pregnancy and Preeclampsia, a Systematic Review and Meta-Analysis
Source: MDPI journal article supplement (doi:10.3390/nu14050999), 2022-02-27
Supplement: s1 [file s1]

Table S2: The Newcastle-Ottawa Scale (NOS) for assessing the quality of case-control studies.

| Studies                                 | Is the Case Definition Adequate | Representativeness of the Cases | Selection of Controls | Definition of Controls | Comparability of Cases and Controls |               | Ascertainment of Exposure | Same method of ascertainment for cases and controls | Non-Response Rate |
|-----------------------------------------|---------------------------------|---------------------------------|-----------------------|------------------------|-------------------------------------|---------------|---------------------------|-----------------------------------------------------|-------------------|
|                                         |                                 |                                 |                       |                        | Age                                 | Other factors |                           |                                                     |                   |
| Wetta, Biggio et al. (2014)             | 1                               | 1                               | 1                     | 1                      | 1                                   | 1             | 1                         | 1                                                   | 1                 |
| Baker, Haeri et al. (2010)              | 1                               | 1                               | 1                     | 1                      | 1                                   | 1             | 1                         | 1                                                   | 0                 |
| Schneuer, Roberts et al. (2014)         | 1                               | 1                               | 1                     | 1                      | 1                                   | 1             | 1                         | 1                                                   | 1                 |
| Powe, Seely et al. (2010)               | 1                               | 1                               | 1                     | 1                      | 0                                   | 1             | 1                         | 1                                                   | 0                 |
| Baca, Simhan et al. (2016)              | 1                               | 1                               | 1                     | 1                      | 1                                   | 1             | 1                         | 1                                                   | 0                 |
| Bodnar, Catov et al. (2007)             | 1                               | 1                               | 1                     | 1                      | 0                                   | 1             | 1                         | 1                                                   | 0                 |
| Benachi, Baptiste et al. (2020)         | 1                               | 1                               | 1                     | 1                      | 1                                   | 1             | 1                         | 1                                                   | 1                 |
| Achkar, Dodds et al. (2015)             | 1                               | 1                               | 1                     | 1                      | 1                                   | 1             | 1                         | 1                                                   | 0                 |
| Mirzakhani, Litonjua et al. (2016)      | 1                               | 1                               | 1                     | 1                      | 1                                   | 1             | 1                         | 1                                                   | 0                 |
| Álvarez-Fernández, Prieto et al. (2015) | 1                               | 0                               | 1                     | 1                      | 0                                   | 1             | 1                         | 1                                                   | 0                 |
| Gidlöf, Silva et al. (2015)             | 1                               | 1                               | 1                     | 1                      | 0                                   | 0             | 1                         | 1                                                   | 1                 |
