# Supplementary material for: Vitamin D Levels in Early and Middle Pregnancy and Preeclampsia, a Systematic Review and Meta-Analysis
Source: MDPI journal article supplement (doi:10.3390/nu14050999), 2022-02-27
Supplement: s1 [file s1]

Table S3: The Newcastle-Ottawa Scale (NOS) for assessing the quality of cohort studies.

| Studies                                      | Representative<br>ness of the<br>exposed cohort | Selection of<br>the non<br>exposed<br>cohort | Ascertain<br>ment of<br>exposure | Demonstration that<br>outcome of interest was<br>not present at start of<br>study | Comparability<br>of cohorts |                  | Assessment<br>of outcome | Was follow-up<br>long enough<br>for outcomes<br>to occur | Adequacy<br>of follow<br>up of<br>cohorts |
|----------------------------------------------|-------------------------------------------------|----------------------------------------------|----------------------------------|-----------------------------------------------------------------------------------|-----------------------------|------------------|--------------------------|----------------------------------------------------------|-------------------------------------------|
|                                              |                                                 |                                              |                                  |                                                                                   | Age                         | Other<br>factors |                          |                                                          |                                           |
| Zhou, Su et al.<br>(2014)                    | 1                                               | 1                                            | 1                                | 1                                                                                 | 1                           | 1                | 1                        | 1                                                        | 1                                         |
| Hemmingway,<br>Kenny et al.<br>(2018)        | 1                                               | 1                                            | 1                                | 1                                                                                 | 1                           | 1                | 1                        | 1                                                        | 1                                         |
| Wei, Audibert<br>et al. (2012)               | 1                                               | 1                                            | 1                                | 1                                                                                 | 1                           | 1                | 1                        | 1                                                        | 1                                         |
| Flood-Nichols,<br>Tinnemore et<br>al. (2015) | 1                                               | 1                                            | 1                                | 0                                                                                 | 0                           | 1                | 1                        | 1                                                        | 1                                         |
| Shand, Nassar<br>et al. (2010)               | 0                                               | 1                                            | 1                                | 1                                                                                 | 1                           | 1                | 1                        | 1                                                        | 1                                         |
| Van Weert, van<br>den Berg et al.<br>(2016)  | 1                                               | 1                                            | 1                                | 1                                                                                 | 1                           | 1                | 1                        | 1                                                        | 1                                         |
| Magnus,<br>Miliku et al.<br>(2018)           | 1                                               | 1                                            | 1                                | 1                                                                                 | 1                           | 1                | 1                        | 1                                                        | 1                                         |
| Scholl, Chen<br>et al. (2013)                | 0                                               | 1                                            | 1                                | 1                                                                                 | 1                           | 1                | 1                        | 1                                                        | 1                                         |
