# Supplementary material for: Vitamin D Levels in Early and Middle Pregnancy and Preeclampsia, a Systematic Review and Meta-Analysis
Source: MDPI journal article supplement (doi:10.3390/nu14050999), 2022-02-27
Supplement: s1 [file s1]

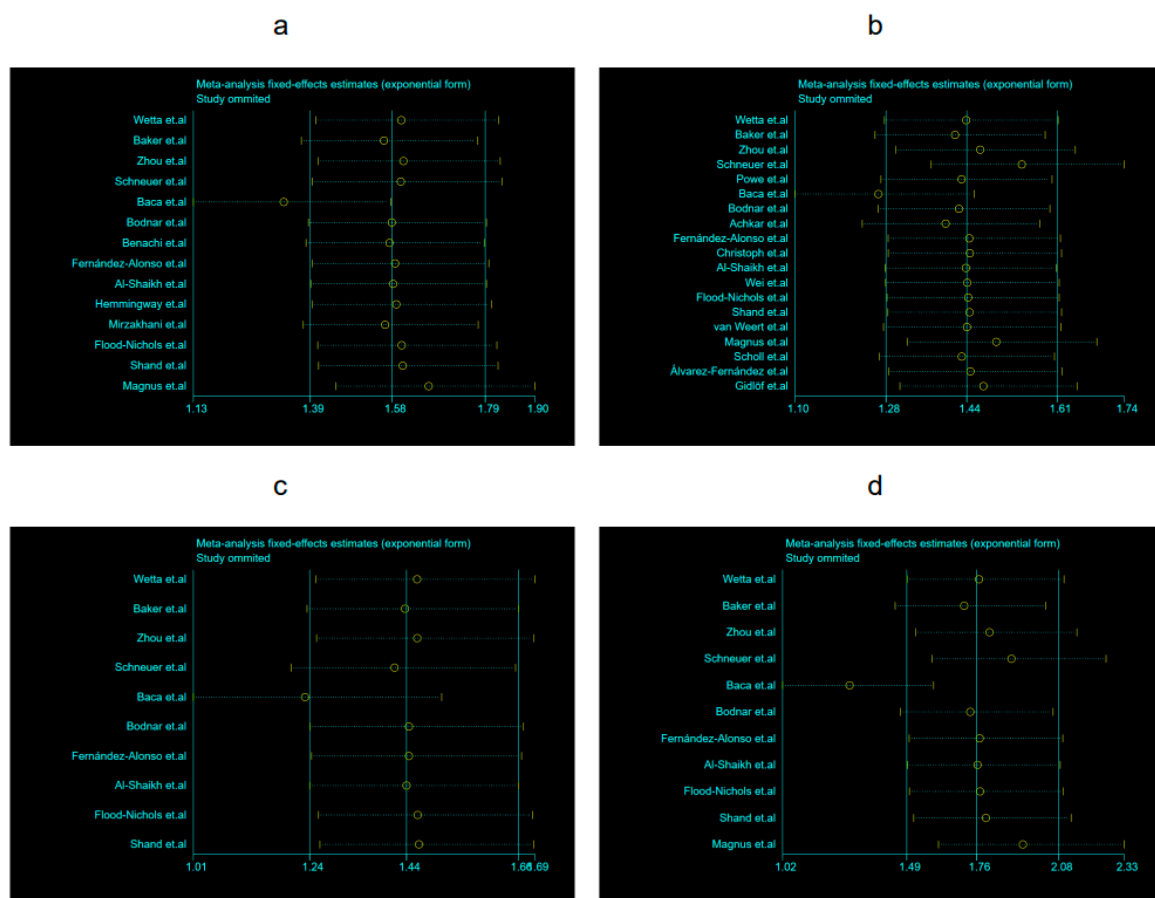

**Figure S3.** Sensitivity analysis investigating the influence of a single study on the overall meta-analysis estimate. **(a):** Studies evaluating replete versus insufficient or deficient vitamin D levels; **(b):** Studies evaluating replete or insufficient versus deficient vitamin D levels; **(c):** Studies evaluating replete versus insufficient vitamin D levels; **(d):** Studies evaluating replete versus deficient vitamin D levels.
