# Supplementary material for: Vitamin D Levels in Early and Middle Pregnancy and Preeclampsia, a Systematic Review and Meta-Analysis
Source: MDPI journal article supplement (doi:10.3390/nu14050999), 2022-02-27
Supplement: s1 [file s1]

Table S4. AHQR for assessing the quality of cross-sectional studies.

| Studies                                        | Define the source of information | List inclusion and exclusion criteria | Indicate time period used for identifying patients | Indicate whether or not subjects were consecutive | Indicate if evaluators were masked to other aspects of the status of the participants | Describe any assessments for quality assurance purposes | Explain any patient exclusions from analysis | Describe how confounding was assessed and/or controlled | If applicable, explain how missing data were handled in the analysis | Summarize patient response rates and completeness of data collection | Clarify what follow-up was expected and the percentage of patients for which incomplete data or follow-up was obtained | Total score |
|------------------------------------------------|----------------------------------|---------------------------------------|----------------------------------------------------|---------------------------------------------------|---------------------------------------------------------------------------------------|---------------------------------------------------------|----------------------------------------------|---------------------------------------------------------|----------------------------------------------------------------------|----------------------------------------------------------------------|------------------------------------------------------------------------------------------------------------------------|-------------|
| Fernández-Alonso, Dionis-Sánchez et al. (2012) | 1                                | 1                                     | 1                                                  | 1                                                 | 1                                                                                     | 1                                                       | 0                                            | 0                                                       | 0                                                                    | 0                                                                    | 1                                                                                                                      | 7           |
| Christoph, Challande et al. (2020)             | 1                                | 1                                     | 1                                                  | 1                                                 | 1                                                                                     | 1                                                       | 0                                            | 0                                                       | 0                                                                    | 0                                                                    | 1                                                                                                                      | 7           |
| Al-Shaikh, Ibrahim et al. (2016)               | 1                                | 1                                     | 1                                                  | 1                                                 | 1                                                                                     | 1                                                       | 0                                            | 0                                                       | 0                                                                    | 1                                                                    | 1                                                                                                                      | 8           |
