# Supplementary figures and images for: Vitamin D Levels in Early and Middle Pregnancy and Preeclampsia, a Systematic Review and Meta-Analysis
Source: MDPI journal article supplement (doi:10.3390/nu14050999), 2022-02-27

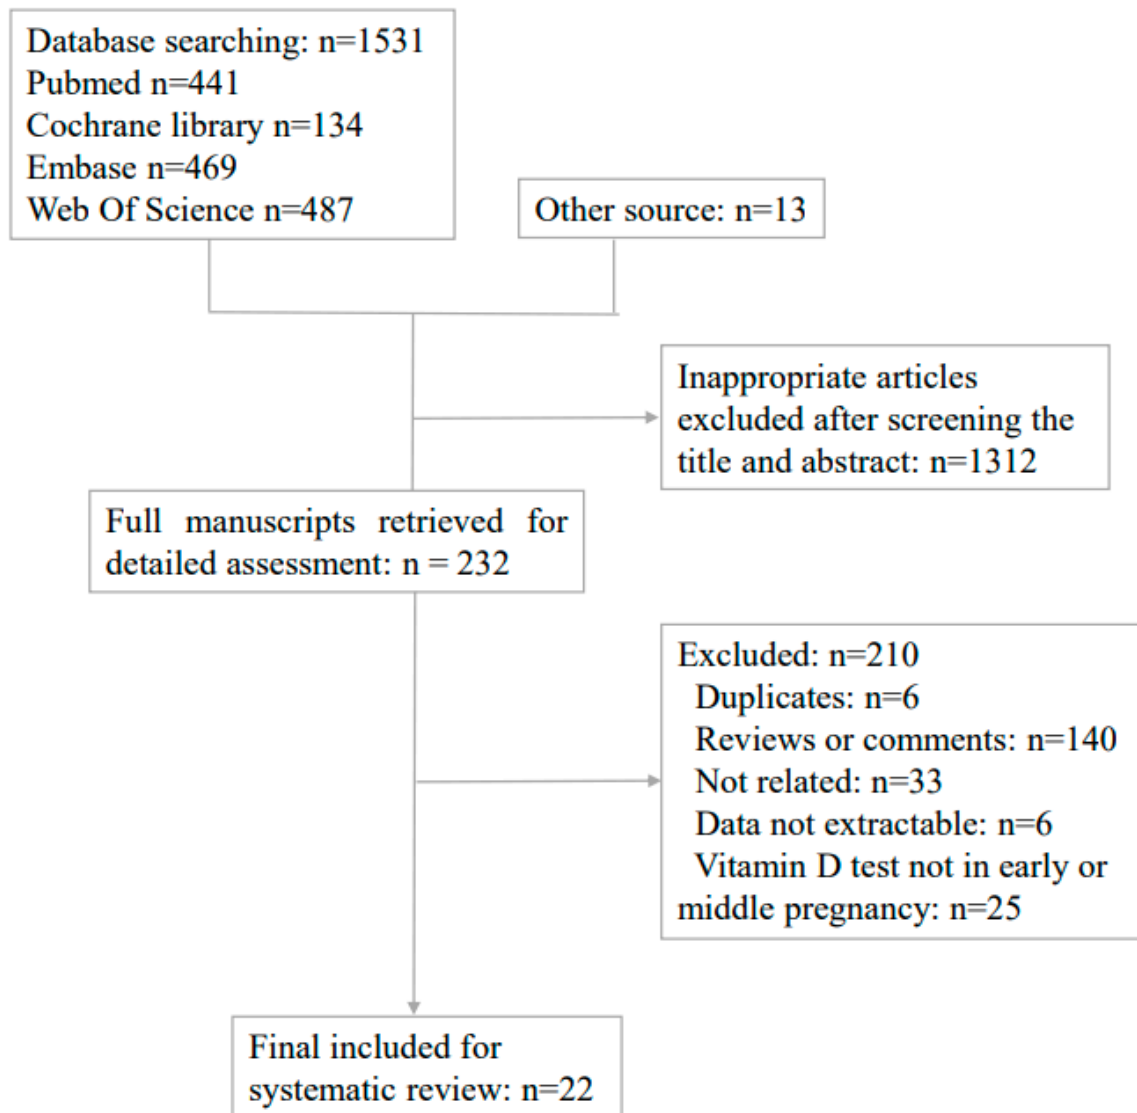

**Figure S1.** Flowchart for study selection.

Supplement: s1 [file s1]
